# Supplementary material
Source: PubMed Central journal article supplement (PMC4718869)
Supplement: NIHMS736091-supplement-Supp_FigS1-S5___TableS2-S3.pdf [file NIHMS736091-supplement-Supp_FigS1-S5___TableS2-S3.pdf]

**SUPPORTING INFORMATION FOR THE ARTICLE:**

**Mechanisms for the Generation of Two Quadruplications  
Associated with Split-Hand Malformation**

Shen Gu<sup>1</sup>, Jennifer E. Posey<sup>1</sup>, Bo Yuan<sup>1</sup>, Claudia M.B. Carvalho<sup>1</sup>, H.M. Luk<sup>2</sup>, Kelly Erikson<sup>3</sup>,  
Ivan F.M. Lo<sup>2</sup>, Gordon K.C. Leung<sup>5,6</sup>, Curtis R. Pickering<sup>3</sup>, Brian H.Y. Chung<sup>4,5</sup> and James R.  
Lupski<sup>1,6,7,8,\*</sup>

<sup>1</sup>Department of Molecular & Human Genetics, Baylor College of Medicine, Houston, TX 77030, USA.

<sup>2</sup>Clinical Genetic Service, Department of Health, Hong Kong, China

<sup>3</sup>Department of Head and Neck Surgery, The University of Texas MD Anderson Cancer Center, Houston, TX 77030, USA

<sup>4</sup>Department of Paediatrics and Adolescent Medicine, Queen Mary Hospital, Li Ka Shing Faculty of Medicine, The University of Hong Kong, Hong Kong, China

<sup>5</sup>Department of Obstetrics & Gynaecology, Li Ka Shing Faculty of Medicine, The University of Hong Kong, Hong Kong, China

<sup>6</sup>Department of Pediatrics, Baylor College of Medicine, Houston, TX 77030, USA.

<sup>7</sup>Human Genome Sequencing Center, Baylor College of Medicine, Houston, TX 77030, USA.

<sup>8</sup>Texas Children's Hospital, Houston, TX 77030, USA.

**\* To whom correspondence should be addressed:**

James R. Lupski

Tel: 1-713-798-6530

Fax: 1-713-798-5073

E-mail: [jlupski@bcm.edu](mailto:jlupski@bcm.edu)

## **SUPP. MATERIALS AND METHODS**

### **Subjects**

This study was approved by the Institutional Review Board for Human Subject Research at BCM (IRB No. H-25466). Informed consent was obtained.

### **High-density aCGH**

An 8X 60K high-density Agilent array designed with ~150 bp per probe covering the first 6 Mb of chromosome 17p (17pter to 17p13.2) and ~5000 bp per probe covering the remaining chromosome 17 was used. Hybridization controls were gender matched (HapMap individual NA10851 as male control and HapMap individual NA15510 as female control). Scanned array images were processed using Agilent Feature Extraction software (version 10) and extracted files were analyzed using Agilent Genomic Workbench (version 7.0.4.0). In theory, aCGH log<sub>2</sub>-based intensity ratio between the input sample and control is  $\log_2(3/2) = 0.58$  for duplications,  $\log_2(4/2) = 1$  for triplications, and  $\log_2(5/2) = 1.32$  for quadruplications. Array designs and sequence alignment for breakpoint analysis were based on the February 2009 genome build (GRCh37/hg19 assembly).

### **Breakpoint junction mapping**

Primer design and long-rang PCRs for breakpoint junctions mapping were performed as previously described (Gu et al., 2015). Purified PCR products were sequenced by Sanger di-deoxynucleotide sequencing (BCM Sequencing Core, Houston, TX, USA).

### **ddPCR**

ddPCR was performed using the QX200™ AutoDG™ Droplet Digital™ PCR System from Bio-Rad following manufacture's protocols. Briefly, a 20uL mixture was set up for each PCR reaction, containing 10uL of 2x Q200 ddPCR EvaGreen Supermix, 0.25uL of KpnI or *AluI*

restriction enzyme (NEB, Cat. No. R0142S and R0137S), 0.25uL of each primer (10uM) and 15ng of genomic DNA. Reaction mixture was incubated at 37°C for an hour for enzymatic digestion, following by automatic droplet generation, PCR reaction and droplet reading. Cycling conditions for PCR are as the following: 5 minutes (mins) at 95°C, 40 cycles of 30 seconds (sec) at 95°C / 1 min at 60°C / 1 min at 72°C, 5 mins at 4°C, 5 mins at 90°C and finally infinite hold at 4°C. Ramp rate was set for 2°C per sec for all steps. Data was analyzed using QuantaSoft™ Software from Bio-Rad, and concentrations of positive droplets (number of positive droplets per uL of reaction) were obtained for each PCR reaction. Primer sequences are shown in Supp. Table S1.

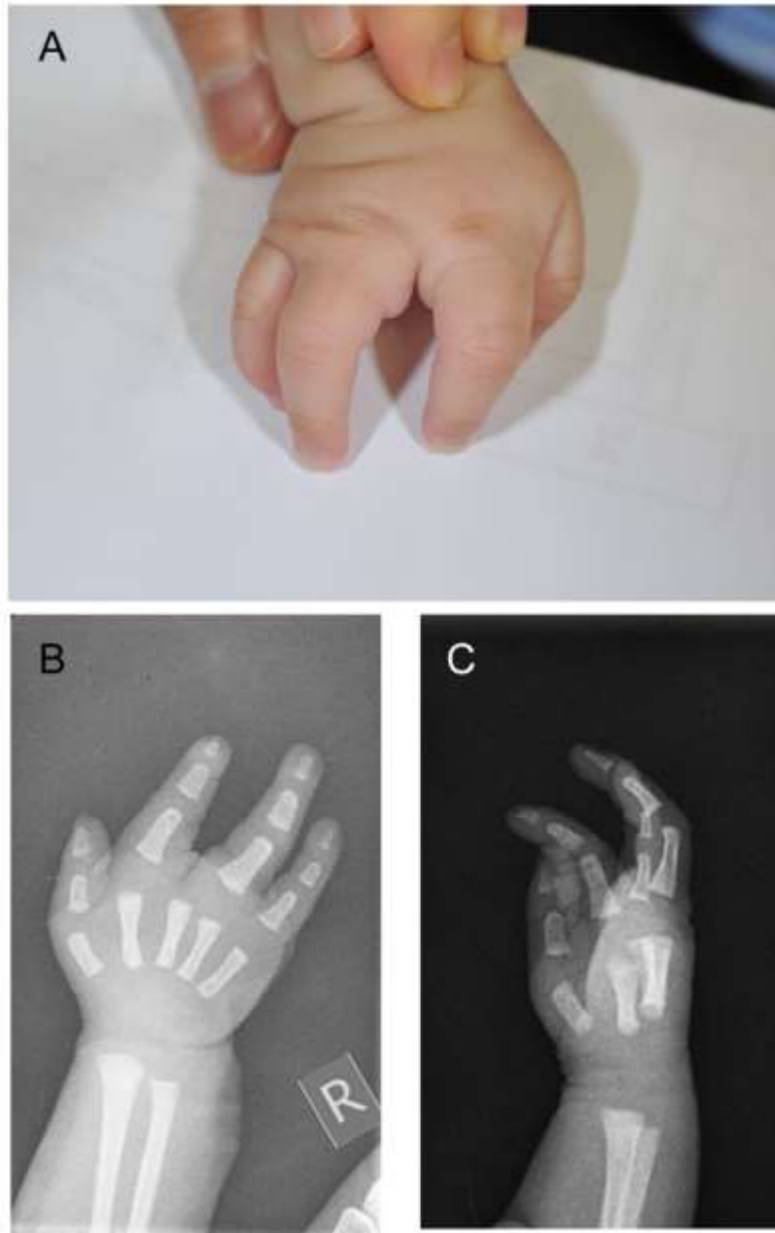

**Supp. Figure S1. A).** Photograph demonstrates a limb malformation with a median cleft of the right hand and aplasia of the right middle phalanx in BAB7221. Posterior /anterior (**B**) and lateral (**C**) radiographs of the right hand demonstrate absent proximal, middle, and distal phalanges of the third digit. All other phalanges and all metacarpals are present and structurally normal.

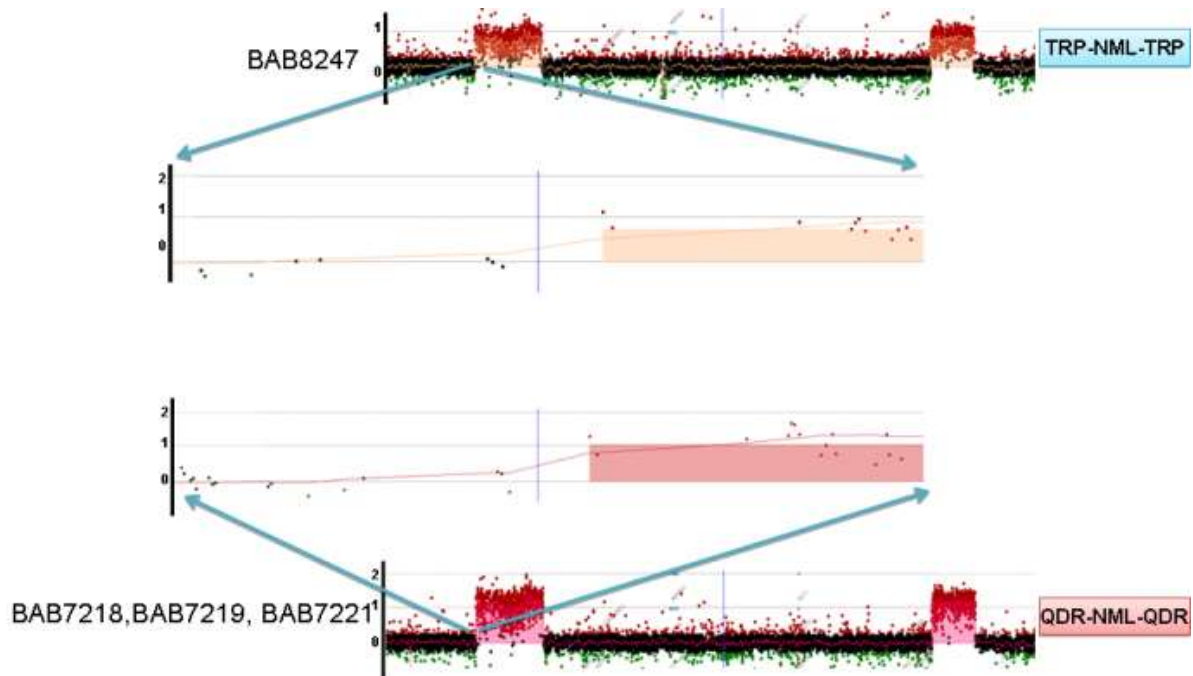

**Supp. Figure S2.** Enlarged aCGH images of the boundary of the gained region. Quadruplications and triplications detected by high-density aCGH showed sharp edges (direct transition between copy-number gain to copy-number neutral without shoulders) in all four individual tested. Enlarged images of the distal side of the first gain were used for illustration. Array plot of BAB7219 was used for demonstration (lower panel) QDR, quadruplication; NML, normal; TRP, triplication.

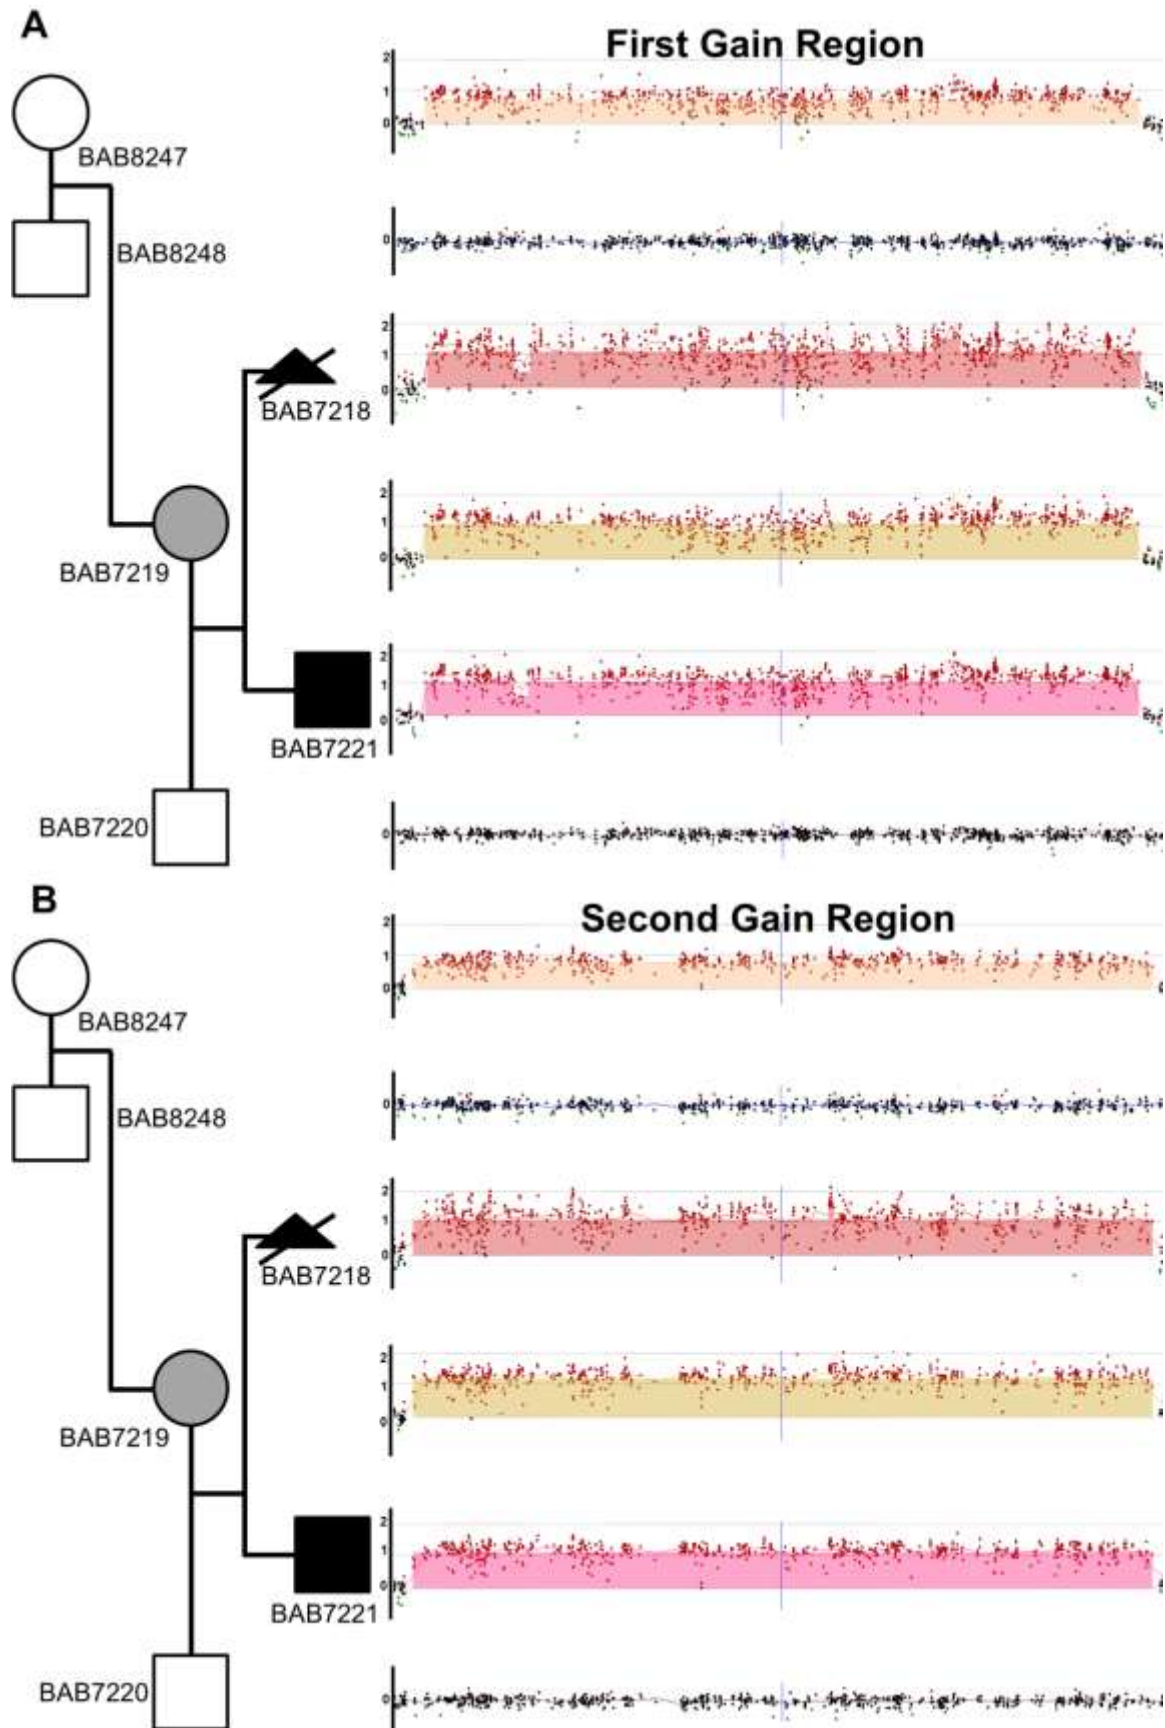

**Supp. Figure S3.** Enlarged aCGH images of the two gained regions. Enlarged aCGH images demonstrated higher log<sub>2</sub> ratio for both regions in BAB7218, 7219 and 7221 (log<sub>2</sub> ratio >1) with two quadruplications in comparison to the log<sub>2</sub> ratio in BAB8247 (log<sub>2</sub> ratio <1) with two triplications. See also Supp. Table S1.

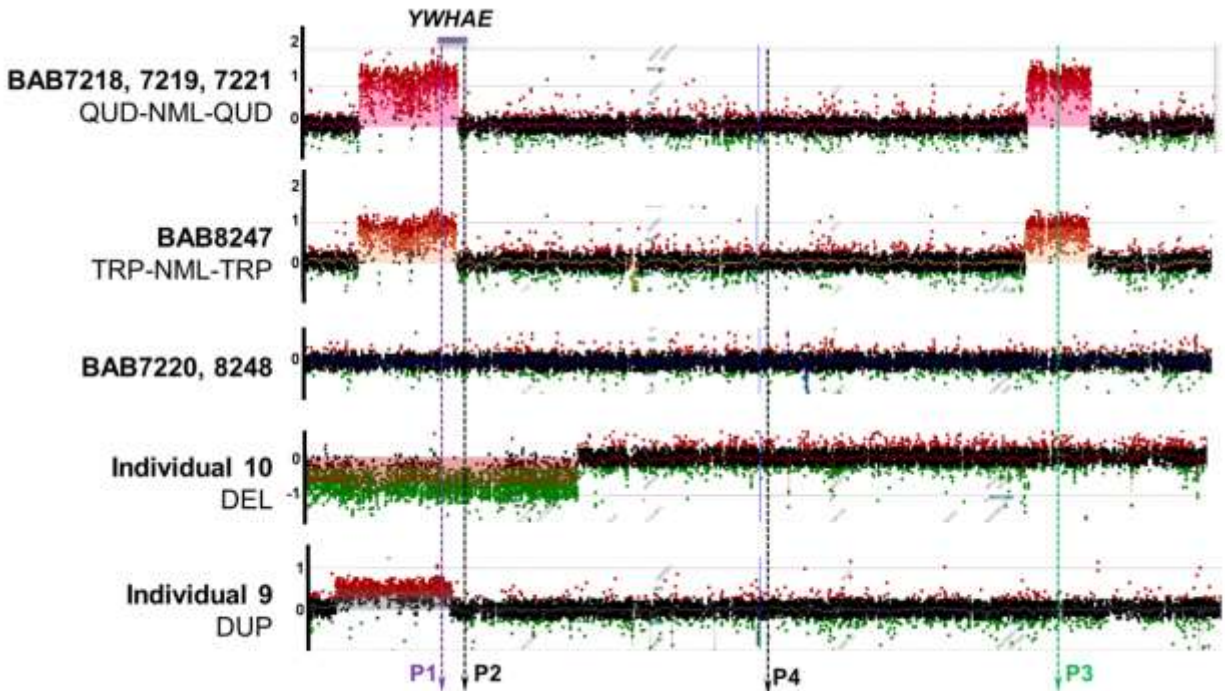

**Supp. Figure S4.** ddPCR primer pairs. Four pairs of primers, P1, P2, P3 and P4 were used to perform ddPCR; their map positions are demonstrated by different colored vertical lines using representative aCGH images. Note that P1 (purple) and P3 (green) are located in the two regions revealing copy number gains in BAB7218, 7219, 7221 and 8247, respectively, while P2 and P4 (both black) are located in the unaltered copy-number region in between. Both P1 and P2 are designed within the *YWHAE* gene, part of which is quadruplicated / triplicated in the above mentioned four family members. Individual 10 and Individual 9 are previously reported individuals with deletion and duplication at 17p13.3, respectively, and were used for comparison for the ddPCR assays (Gu et al., 2015). Primer sequences are shown in Supp. Table S3. TRP, triplication; NML, normal; QDR, quadruplication; DEL, deletion; DUP, duplication.



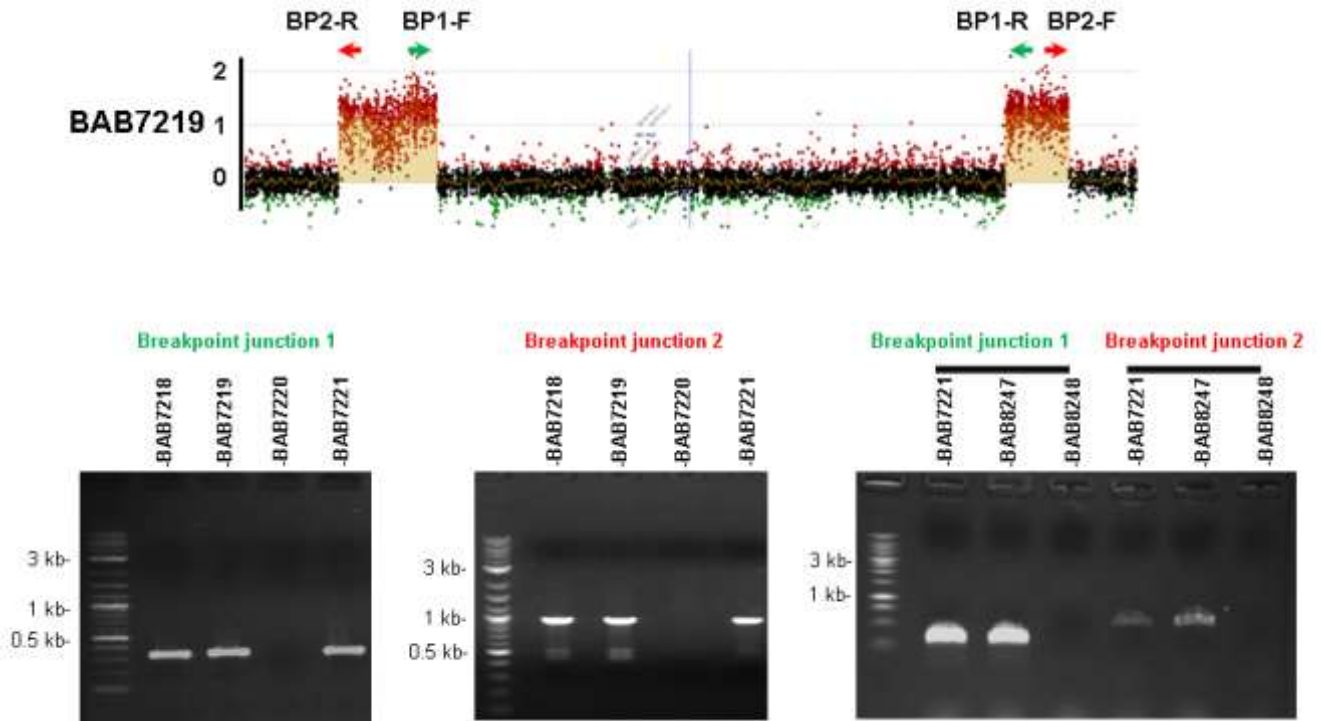

**Supp. Figure S5.** PCR of the two breakpoint junctions in all the family members. PCR of breakpoint junction 1 used primer pair BP1-F and BP1-R, while PCR of breakpoint junction 2 used primer pair BP2-F and BP2-R (upper panel). Array plot of BAB7219 was shown for demonstration. Both breakpoint junctions were present in BAB7218, BAB7219, BAB7221 and BAB8247 with quadruplications or triplications, but not in BAB7220 or BAB8248 with no CNV detected. Sequences of the primers are listed in Supp. Table S3.

**Supp. Table S1. High Density Array Raw Data**, is available as a separate Excel file under the Supporting Information for this article.

**Supp. Table S2. ddPCR raw data**

| Sample  | Target | Concentration (droplet/uL) | Copies Per 20uL Well | Poisson ConfMax | Poisson ConfMin | Positives | Negatives | Accepted Droplets |
|---------|--------|----------------------------|----------------------|-----------------|-----------------|-----------|-----------|-------------------|
| BAB7218 | P1     | 184                        | 3680                 | 190             | 177             | 2837      | 16793     | 19630             |
| BAB7218 | P2     | 77.9                       | 1558                 | 82.1            | 73.7            | 1336      | 19512     | 20848             |
| BAB7218 | P3     | 182                        | 3640                 | 188             | 175             | 2865      | 17173     | 20038             |
| BAB7218 | P4     | 80.8                       | 1616                 | 85.4            | 76.3            | 1222      | 17178     | 18400             |
| BAB7218 | RPPH1  | 80.4                       | 1608                 | 85.1            | 75.9            | 1173      | 16574     | 17747             |
| BAB7218 | TERT   | 72.5                       | 1450                 | 76.5            | 68.5            | 1256      | 19758     | 21014             |
| BAB7219 | P1     | 530                        | 10600                | 542             | 517             | 7040      | 12373     | 19413             |
| BAB7219 | P2     | 193                        | 3860                 | 200             | 186             | 3134      | 17561     | 20695             |
| BAB7219 | P3     | 470                        | 9400                 | 481             | 458             | 6571      | 13391     | 19962             |
| BAB7219 | P4     | 201                        | 4020                 | 208             | 194             | 3016      | 16171     | 19187             |
| BAB7219 | RPPH1  | 217                        | 4340                 | 225             | 209             | 3130      | 15461     | 18591             |
| BAB7219 | TERT   | 182                        | 3640                 | 189             | 175             | 2836      | 16960     | 19796             |
| BAB7220 | P1     | 182                        | 3640                 | 189             | 175             | 2950      | 17628     | 20578             |
| BAB7220 | P2     | 171                        | 3420                 | 178             | 165             | 2766      | 17627     | 20393             |
| BAB7220 | P3     | 198                        | 3960                 | 205             | 191             | 3080      | 16826     | 19906             |
| BAB7220 | P4     | 183                        | 3660                 | 190             | 176             | 2732      | 16228     | 18960             |
| BAB7220 | RPPH1  | 181                        | 3620                 | 188             | 174             | 2588      | 15605     | 18193             |
| BAB7220 | TERT   | 177                        | 3540                 | 185             | 170             | 2308      | 14173     | 16481             |
| BAB7221 | P1     | 420                        | 8400                 | 431             | 409             | 5626      | 13100     | 18726             |
| BAB7221 | P2     | 171                        | 3420                 | 177             | 164             | 2569      | 16446     | 19015             |
| BAB7221 | P3     | 414                        | 8280                 | 425             | 403             | 5655      | 13422     | 19077             |
| BAB7221 | P4     | 188                        | 3760                 | 194             | 181             | 2855      | 16521     | 19376             |
| BAB7221 | RPPH1  | 182                        | 3640                 | 189             | 175             | 2440      | 14581     | 17021             |
| BAB7221 | TERT   | 165                        | 3300                 | 172             | 157             | 2059      | 13714     | 15773             |
| BAB8247 | P1     | 326                        | 6520                 | 336             | 317             | 4480      | 14025     | 18505             |
| BAB8247 | P2     | 173                        | 3460                 | 180             | 166             | 2709      | 17103     | 19812             |
| BAB8247 | P3     | 317                        | 6340                 | 326             | 307             | 4343      | 14059     | 18402             |
| BAB8247 | P4     | 151                        | 3020                 | 158             | 145             | 2308      | 16806     | 19114             |

| <b>Sample</b>    | <b>Target</b> | <b>Concentration<br/>(droplet/uL)</b> | <b>Copies<br/>Per<br/>20uL<br/>Well</b> | <b>Poisson<br/>ConfMax</b> | <b>Poisson<br/>ConfMin</b> | <b>Positives</b> | <b>Negatives</b> | <b>Accepted<br/>Droplets</b> |
|------------------|---------------|---------------------------------------|-----------------------------------------|----------------------------|----------------------------|------------------|------------------|------------------------------|
| BAB8247          | RPPH1         | 149                                   | 2980                                    | 156                        | 143                        | 1965             | 14523            | 16488                        |
| BAB8247          | TERT          | 145                                   | 2900                                    | 151                        | 139                        | 2264             | 17242            | 19506                        |
| BAB8248          | P1            | 152                                   | 3040                                    | 158                        | 146                        | 2451             | 17741            | 20192                        |
| BAB8248          | P2            | 164                                   | 3280                                    | 171                        | 158                        | 2703             | 18024            | 20727                        |
| BAB8248          | P3            | 177                                   | 3540                                    | 183                        | 170                        | 2851             | 17604            | 20455                        |
| BAB8248          | P4            | 179                                   | 3580                                    | 186                        | 172                        | 2708             | 16492            | 19200                        |
| BAB8248          | RPPH1         | 165                                   | 3300                                    | 172                        | 159                        | 2531             | 16776            | 19307                        |
| BAB8248          | TERT          | 154                                   | 3080                                    | 161                        | 147                        | 1925             | 13736            | 15661                        |
| Individual<br>10 | P1            | 75.7                                  | 1514                                    | 79.9                       | 71.6                       | 1279             | 19237            | 20516                        |
| Individual<br>10 | P2            | 71.7                                  | 1434                                    | 75.8                       | 67.7                       | 1219             | 19392            | 20611                        |
| Individual<br>10 | P3            | 155                                   | 3100                                    | 161                        | 149                        | 2563             | 18206            | 20769                        |
| Individual<br>10 | P4            | 158                                   | 3160                                    | 164                        | 152                        | 2384             | 16582            | 18966                        |
| Individual<br>10 | RPPH1         | 158                                   | 3160                                    | 164                        | 152                        | 2377             | 16535            | 18912                        |
| Individual<br>10 | TERT          | 144                                   | 2880                                    | 150                        | 137                        | 1832             | 14111            | 15943                        |
| Individual<br>9  | P1            | 224                                   | 4480                                    | 231                        | 216                        | 3630             | 17328            | 20958                        |
| Individual<br>9  | P2            | 145                                   | 2900                                    | 151                        | 139                        | 2374             | 18119            | 20493                        |
| Individual<br>9  | P3            | 170                                   | 3400                                    | 177                        | 164                        | 2662             | 17076            | 19738                        |
| Individual<br>9  | P4            | 167                                   | 3340                                    | 174                        | 161                        | 2418             | 15837            | 18255                        |
| Individual<br>9  | RPPH1         | 161                                   | 3220                                    | 167                        | 154                        | 2371             | 16173            | 18544                        |
| Individual<br>9  | TERT          | 162                                   | 3240                                    | 169                        | 155                        | 2090             | 14153            | 16243                        |
| N/A<br>10851     | P1            | 174                                   | 3480                                    | 181                        | 168                        | 2747             | 17227            | 19974                        |

| <b>Sample</b> | <b>Target</b> | <b>Concentration<br/>(droplet/uL)</b> | <b>Copies<br/>Per<br/>20uL<br/>Well</b> | <b>Poisson<br/>ConfMax</b> | <b>Poisson<br/>ConfMin</b> | <b>Positives</b> | <b>Negatives</b> | <b>Accepted<br/>Droplets</b> |
|---------------|---------------|---------------------------------------|-----------------------------------------|----------------------------|----------------------------|------------------|------------------|------------------------------|
| N/A<br>10851  | P2            | 187                                   | 3740                                    | 194                        | 180                        | 2887             | 16733            | 19620                        |
| N/A<br>10851  | P3            | 170                                   | 3400                                    | 177                        | 164                        | 2718             | 17470            | 20188                        |
| N/A<br>10851  | P4            | 187                                   | 3740                                    | 193                        | 180                        | 2879             | 16753            | 19632                        |
| N/A<br>10851  | RPPH1         | 186                                   | 3720                                    | 193                        | 179                        | 2819             | 16438            | 19257                        |
| N/A<br>10851  | TERT          | 177                                   | 3540                                    | 184                        | 170                        | 2815             | 17341            | 20156                        |
| BAB7218       | Jct_ctrl      | 51.2                                  | 1024                                    | 54.7                       | 47.7                       | 814              | 18307            | 19121                        |
| BAB7218       | Jct1          | 73.9                                  | 1478                                    | 78.2                       | 69.6                       | 1156             | 17834            | 18990                        |
| BAB7218       | Jct2          | 73.6                                  | 1472                                    | 77.8                       | 69.3                       | 1155             | 17901            | 19056                        |
| BAB7219       | Jct_ctrl      | 121                                   | 2420                                    | 127                        | 116                        | 1822             | 16808            | 18630                        |
| BAB7219       | Jct1          | 174                                   | 3480                                    | 181                        | 166                        | 2239             | 14078            | 16317                        |
| BAB7219       | Jct2          | 170                                   | 3400                                    | 178                        | 163                        | 2041             | 13113            | 15154                        |
| BAB7221       | Jct_ctrl      | 127                                   | 2540                                    | 132                        | 122                        | 2105             | 18476            | 20581                        |
| BAB7221       | Jct1          | 159                                   | 3180                                    | 166                        | 153                        | 2543             | 17517            | 20060                        |
| BAB7221       | Jct2          | 175                                   | 3500                                    | 181                        | 168                        | 2731             | 17054            | 19785                        |
| BAB8247       | Jct_ctrl      | 109                                   | 2180                                    | 115                        | 104                        | 1661             | 17049            | 18710                        |
| BAB8247       | Jct1          | 98                                    | 1960                                    | 103                        | 93.1                       | 1510             | 17382            | 18892                        |
| BAB8247       | Jct2          | 95.1                                  | 1902                                    | 99.8                       | 90.4                       | 1575             | 18712            | 20287                        |

**Supp. Table S3. Primer sequences**

| <b>Name</b> | <b>Sequence (5' - 3')</b>   |
|-------------|-----------------------------|
| P1-F        | CGCTTGTAAGCAACCATGAGATGTG   |
| P1-R        | TGCCTACTGTGGTTGGATGTGATGT   |
| P2-F        | CCGCACTCAATAAAGGAATGGACAC   |
| P2-R        | CTTGGGGCATAAGGTAGGGACTCAG   |
| P3-F        | GACTCCATTTCTGTGGGTGTTGGTT   |
| P3-R        | GTTGCCCTGGATTAACCCTCTTTT    |
| P4-F        | TGATGTCAAAACTGAACTTGTGCTGGT |
| P4-R        | CAGGAACCGCAATCAGATCTCTAAGG  |
| RPPH1-F     | AATGGGCGGAGGAGAGTAGTCTGAAT  |
| RPPH1-R     | CGAAGTGAGTTCAATGGCTGAGGTG   |
| TERT-F      | GCACACCTTTGGTCACTCCAAATTC   |
| TERT-R      | CCACATAGGAATAGTCCATCCCCAGAT |
| Jct_ctrl-F  | TTGTTCTTCTCTGCGTCCTGCTTTC   |
| Jct_ctrl-R  | CCATGGTCACCCTGTGGATCTACTC   |
| Jct1-F      | TGCTGCACAATCGTAAGTTGCTAGT   |
| Jct1-R      | AACCCTGTTTTCTCACATGCTGTC    |
| Jct2-F      | GTAGCTCAGCATGTTCACTGGAGCA   |
| Jct2-R      | CGCATCAGTGTCTAACCATCACAG    |
| BP1-F       | AAAGATTTATGCTCGACCGGG       |
| BP1-R       | GCTTGGCCCCATTGTGATTT        |
| BP2-F       | GTGCCTGGCAACATGTATTT        |
| BP2-R       | CACACCCAGCTAAAtttgtttctct   |

**Supp. Reference**

Gu, S., Yuan, B., Campbell, I.M., Beck, C.R., Carvalho, C.M., Nagamani, S.C., Erez, A., Patel, A., Bacino, C.A., Shaw, C.A., Stankiewicz, P., Cheung, S.W., *et al.* (2015). Alu-mediated diverse and complex pathogenic copy-number variants within human chromosome 17 at p13.3. *Hum Mol Genet* 24, 4061-4077.
